# Supplementary material
Source: PubMed Central journal article supplement (PMC10200287)
Supplement: awac219_supplementary_data.pdf [file awac219_supplementary_data.pdf]

## Supplementary Materials

A full list of region abbreviations and their corresponding definitions is provided in Supplementary Table I.

**Supplementary Table I Full list of region abbreviation definitions**

| <i>Region Abbreviation</i> | <i>Definition/full region name</i>                  |
|----------------------------|-----------------------------------------------------|
| aCR                        | Anterior corona radiata                             |
| AG                         | Angular gyrus                                       |
| Amygdala                   | Amygdala                                            |
| Caudate                    | Caudate nucleus                                     |
| CP                         | Cerebral peduncle                                   |
| CR                         | Corona radiata (middle/superior portion)            |
| Cuneus                     | Cuneus                                              |
| FuG                        | Fusiform gyrus                                      |
| GP                         | Globus pallidus                                     |
| Hippocampus                | Hippocampus                                         |
| IFG opercularis            | Inferior frontal gyrus, pars opercularis            |
| IFG orbitalis              | Inferior frontal gyrus, pars orbitalis              |
| IFG triangularis           | Inferior frontal gyrus, pars triangularis           |
| IOG                        | Inferior occipital gyrus                            |
| ITG                        | Inferior temporal gyrus                             |
| LFOG                       | Lateral fronto-orbital gyrus                        |
| LG                         | Lingual gyrus                                       |
| MFG                        | Middle frontal gyrus (middle portion)               |
| MFOG                       | Middle fronto-orbital gyrus                         |
| Midbrain                   | Midbrain                                            |
| MOG                        | Middle occipital gyrus                              |
| MTG                        | Middle temporal gyrus (middle portion)              |
| MTG pole                   | Pole of middle temporal gyrus                       |
| PCC                        | Posterior cingulate gyrus                           |
| pCR                        | Posterior corona radiata                            |
| pInsula                    | Posterior insula                                    |
| pITG                       | Posterior inferior temporal gyrus                   |
| pMFG                       | Posterior middle frontal gyrus                      |
| pMTG                       | Posterior middle temporal gyrus                     |
| PoCG                       | Postcentral gyrus                                   |
| PrCG                       | Precentral gyrus                                    |
| Precuneus                  | Precuneus                                           |
| pSFG                       | Posterior superior frontal gyrus                    |
| pSTG                       | Posterior superior temporal gyrus                   |
| Putamen                    | Putamen                                             |
| RedNc                      | Red nucleus                                         |
| SFG                        | Superior frontal gyrus                              |
| SLF/AF                     | Superior longitudinal fasciculus/arcuate fasciculus |
| SMG                        | Supramarginal gyrus                                 |
| Snigra                     | Substantia nigra                                    |
| SOG                        | Superior occipital gyrus                            |
| SPL                        | Superior parietal lobule/superior parietal gyrus    |
| STG                        | Superior temporal gyrus (middle portion)            |
| STG pole                   | Pole of superior temporal gyrus                     |
| Thalamus                   | Thalamus                                            |

Figures 1 and 2 from the main body of the manuscript describe LSM analyses including our two primary measures of interest, Word Comprehension (WAB-R Auditory Word Recognition with Pyramids and Palm Trees, PPT, as a covariate) and Noncanonical Sentence Comprehension. Here we report supplementary analyses of these measures including an additional covariate, Repetition (WAB-R Repetition score), in an attempt to control for

phonological processing and focus on lexical and syntactic levels of representation. The results are shown in Supplementary Figure 1.

## Supplementary LSM Analyses

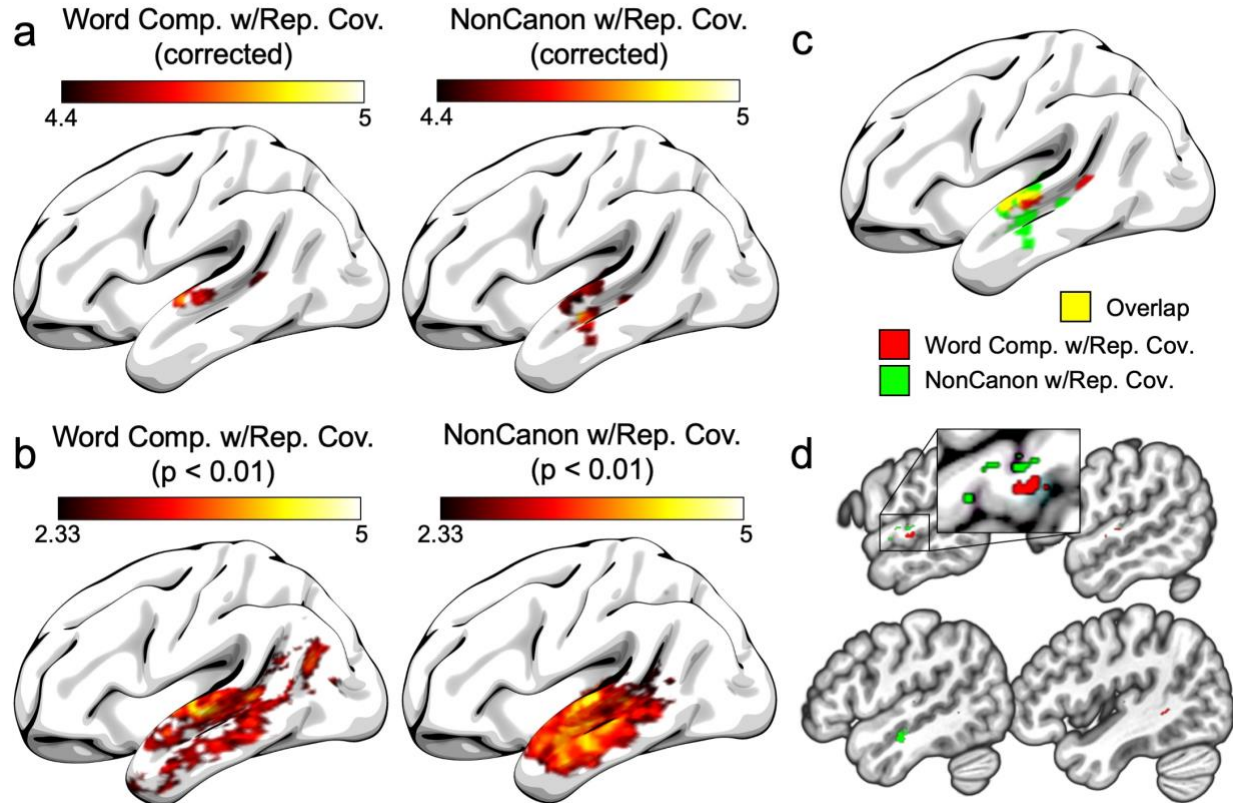

Supplementary Figure 1. Supplementary voxel-based lesion-symptom mapping (LSM) results for Word Comprehension (WAB-R Auditory Word Recognition with the PPT covariate) and Noncanonical Sentence Comprehension incorporating Repetition scores as a covariate. a) Analyses with a permutation correction for multiple comparisons (10,000 permutations, corrected  $p < 0.05$ ), with results spatially smoothed for improved visibility. b) Unsmoothed analyses using an uncorrected voxel-wise threshold of  $p < 0.01$  (one-tailed). c) Smoothed surface rendering of the overlap (yellow) of the corrected lesion maps for Word Comprehension (red) and Noncanonical Sentence Comprehension (green). d) Unsmoothed slices of the volumetric (non-surface-rendered) overlap. Inset shows a zoomed-in view of the portion of the slice surrounded by the rectangle.

Supplementary Figure 2 provides an illustration of the JHU atlas for some (but not all) relevant regions for the LSM and CLSM analyses reported in the manuscript.

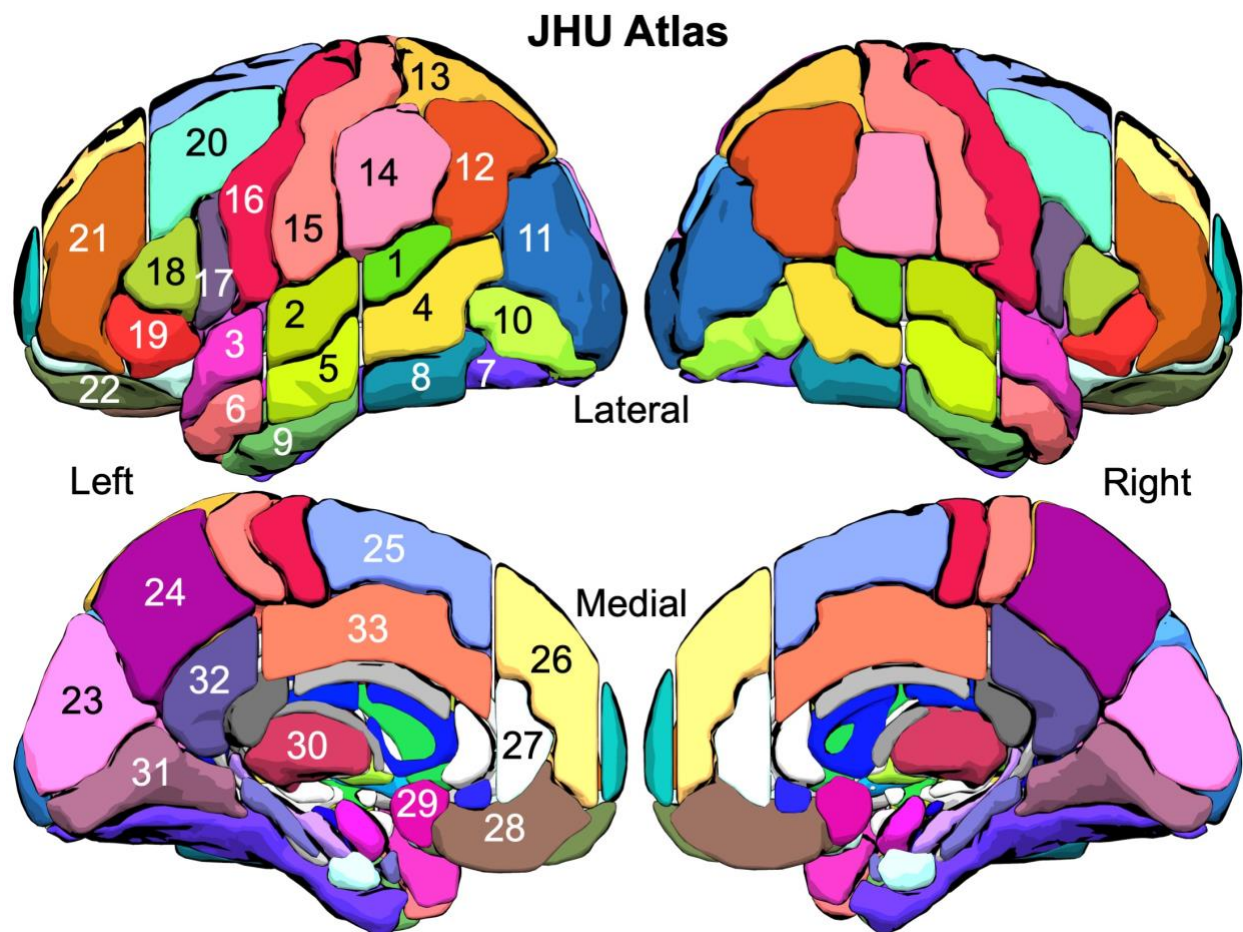

Supplementary Figure 2. Illustration of the JHU atlas. See Supplementary Table 1 for region abbreviation definitions. Numbers illustrate some (but not all) of the relevant regions contained within the atlas. (1): pSTG; (2): STG; (3): STG pole; (4): pMTG; (5): MTG; (6): MTG pole; (7) FuG; (8) pITG; (9) ITG; (10) IOG; (11) MOG; (12) AG; (13) SPL; (14) SMG; (15) PoCG; (16) PrCG; (17) IFG opercularis; (18) IFG triangularis; (19) IFG orbitalis; (20) pMFG; (21) MFG; (22) MFOG; (23) Cuneus; (24) Precuneus; (25) pSFG; (26) SFG; (27) aCR; (28) GR; (29) SaCG; (30) Thalamus; (31) LG; (32) pCR; (33) CR.

The statistical details of the combined LSM-CLSM analyses described in section 2.3.4, with the results summarized in section 3.4, are provided in Supplementary Table 2. The analysis of Word Comprehension (WAB-R Auditory Word Recognition with PPT covariate) assessed the contribution of lesion volume in the four middle and posterior temporal lobe regions identified in our ROI-based LSM analyses, controlling for the strongest disconnection identified in the CLSM analyses involving a more anterior temporal lobe region as well as total lesion volume. For the STG/MTG, this was the MTG pole ↔ SOG, and for the pSTG/pMTG this was the MTG ↔ SOG. The analysis of Noncanonical (Noncanonical sentence comprehension) assessed the contribution of lesion volume in all of the four middle and posterior temporal lobe regions identified in our ROI-based LSM analyses, controlling for the strongest sub-threshold connection involving a subregion of the IFG or MFG identified in the CLSM analyses, the IFG orbitalis ↔ Cuneus, as well as total lesion volume.

Supplementary Table 2 Combined LSM-CLSM analyses

| Analysis | R <sup>2</sup> | β <sub>u</sub> (SE) | β <sub>s</sub> | Z | BF <sub>m</sub> (null) |
|----------|----------------|---------------------|----------------|---|------------------------|
|----------|----------------|---------------------|----------------|---|------------------------|

| <b>Word Comprehension</b>                    |       |                |        |      |          |
|----------------------------------------------|-------|----------------|--------|------|----------|
| pSTG, controlling for MTG ↔ SOG              | 0.218 | -7.190 (2.306) | -0.310 | 3.09 | 7.416e-7 |
| pMTG, controlling for MTG ↔ SOG              | 0.239 | -8.722 (2.301) | -0.347 | 3.71 | 8.707e-8 |
| STG, controlling for MTG pole ↔ SOG          | 0.223 | -8.186 (2.575) | -0.317 | 3.09 | 5.686e-7 |
| MTG, controlling for MTG pole ↔ SOG          | 0.202 | -6.061 (2.526) | -0.213 | 2.37 | 8.392e-6 |
| <b>Noncanonical</b>                          |       |                |        |      |          |
| pSTG, controlling for IFG orbitalis ↔ Cuneus | 0.242 | -3.361 (0.914) | -0.389 | 3.57 | 1.308e-5 |
| pMTG, controlling for IFG orbitalis ↔ Cuneus | 0.230 | -3.112 (0.925) | -0.330 | 3.29 | 3.872e-5 |
| STG, controlling for IFG orbitalis ↔ Cuneus  | 0.261 | -4.330 (1.052) | -0.464 | 3.98 | 2.085e-6 |
| MTG, controlling for IFG orbitalis ↔ Cuneus  | 0.248 | -4.044 (1.059) | -0.374 | 3.70 | 8.117e-6 |

See Supplementary Table 1 for region abbreviation definitions. All regions are left hemisphere.  $\beta_u$  = unstandardized estimated beta coefficient, SE = standard error,  $\beta_s$  = standardized estimated beta coefficient, Z = Z-score,  $BF_m$  (null) = Bayes Factor index indicating support for the null hypothesis.

In order to illustrate the goodness of linear fits to our ROI-based LSM and CLSM data, Supplementary Figures 3 and 4 report scatterplots of the individual subject data used in these analyses.

### LSM Scatterplots

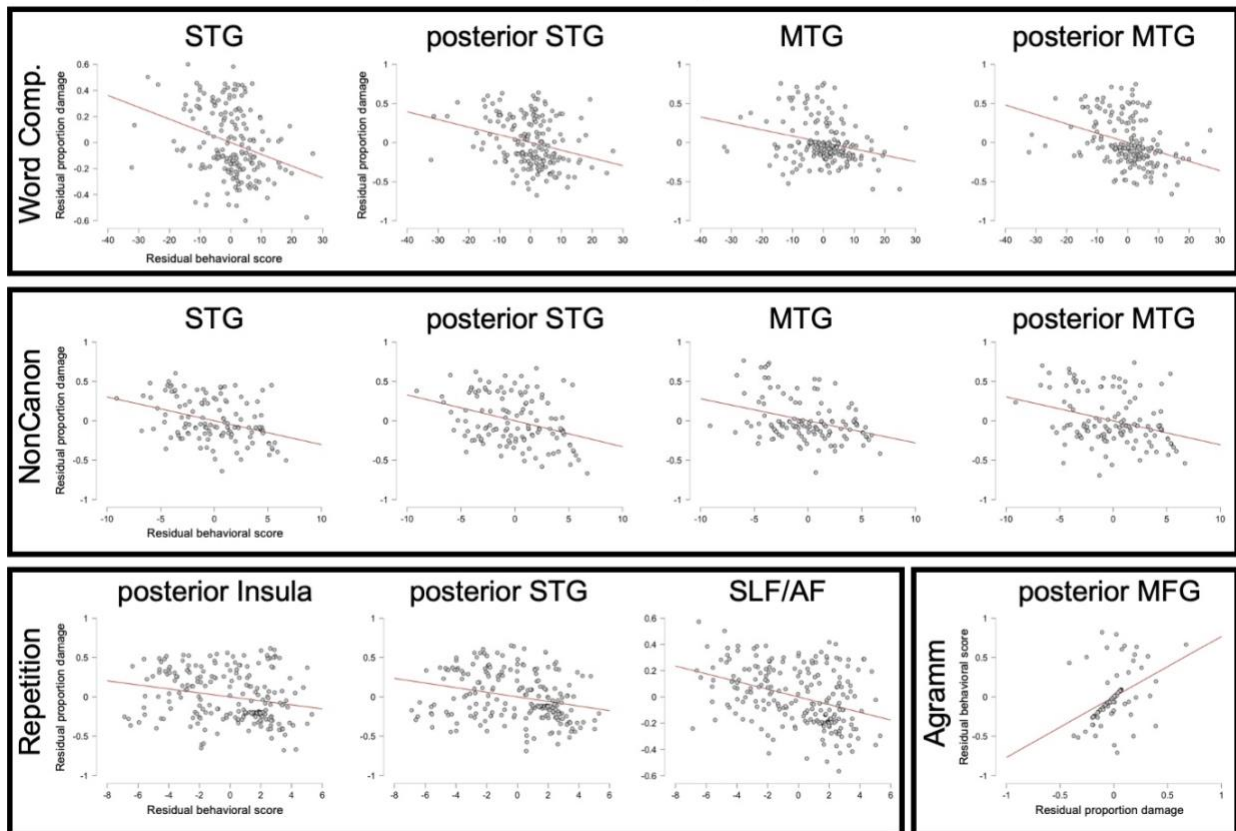

Supplementary Figure 3. Scatterplots of the ROI-based LSM analyses for each behavioral measure, reflecting residual values after the effect of lesion volume is regressed out. Lines indicate linear trend. See Supplementary Table 1 for region abbreviation definitions. Comp = Comprehension; NonCanon = Noncanonical Sentence Comprehension; Agramm = Expressive Agrammatism.

# CLSM Scatterplots

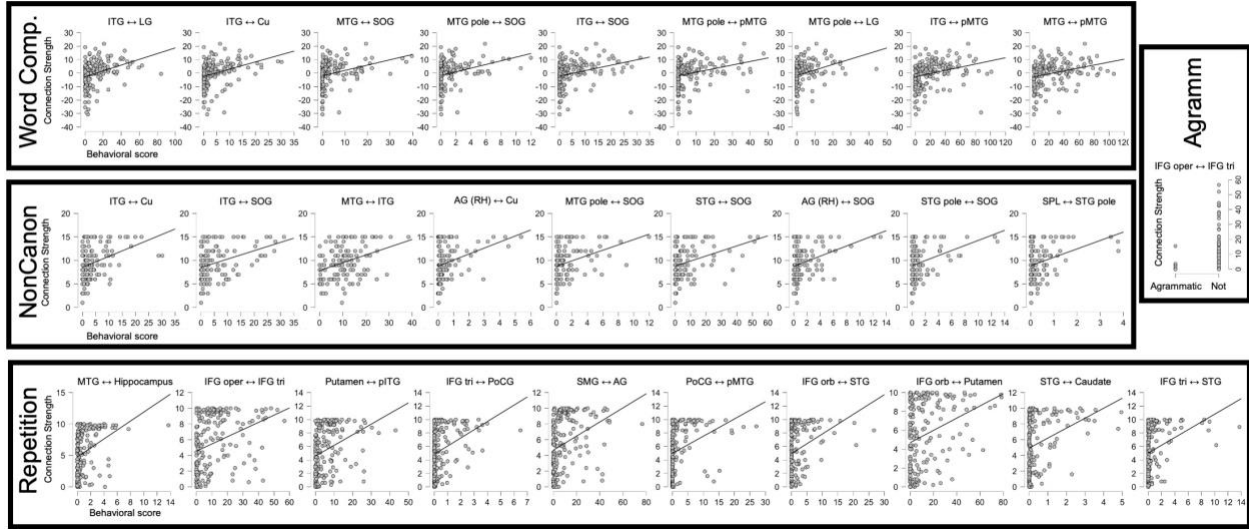

Supplementary Figure 4. Scatterplots of the top ten significant disconnections from the CLSM analyses for each behavioral measure. Lines indicate linear trend. See Supplementary Table 1 for region abbreviation definitions. Comp = Comprehension; NonCanon = Noncanonical Sentence Comprehension; Agramm = Expressive Agrammatism.

In Table 4, we reported the top ten significant connections between regions from the JHU atlas (Faria et al., 2012) to which damage was associated with each of the four primary behavioral measures in our connectome lesion-symptom mapping (CLSM) analyses. Supplementary Table 3 lists the entire set of significant connections, as well as the significant connections for the two supplemental behavioral measures, WAB-R Word Comprehension with PPT and WAB-R Repetition Covariates and Noncanonical Sentence Comprehension with WAB-R Repetition Covariate.

Supplementary Table 3. Full list of significant connections in CLSM analyses.

| Connection                         | R <sup>2</sup> | β <sub>u</sub> (SE) | β <sub>s</sub> | Z    | BF <sub>m</sub> (null) |
|------------------------------------|----------------|---------------------|----------------|------|------------------------|
| <b>WAB-R repetition</b>            |                |                     |                |      |                        |
| MTG ↔ Hippocampus                  | 0.125          | 0.713 (0.135)       | 0.353          | 5.10 | 0.00003                |
| IFG opercularis ↔ IFG triangularis | 0.119          | 1.296 (0.252)       | 0.345          | 4.97 | 0.00005                |
| IFG opercularis ↔ PrCG             | 0.117          | 0.742 (0.146)       | 0.342          | 4.94 | 0.00006                |
| Putamen ↔ pITG                     | 0.116          | 1.215 (0.239)       | 0.341          | 4.92 | 0.00006                |
| SMG ↔ AG                           | 0.115          | 1.278 (0.253)       | 0.339          | 4.89 | 0.00007                |
| PoCG ↔ pMTG                        | 0.107          | 0.419 (0.086)       | 0.328          | 4.71 | 0.0002                 |
| IFG orbitalis ↔ STG                | 0.107          | 0.367 (0.076)       | 0.327          | 4.71 | 0.0002                 |
| IFG orbitalis ↔ Putamen            | 0.107          | 0.065 (0.013)       | 0.327          | 4.70 | 0.0002                 |
| STG ↔ Caudate                      | 0.106          | 1.268 (0.262)       | 0.326          | 4.69 | 0.0002                 |
| IFG triangularis ↔ STG             | 0.106          | 0.184 (0.038)       | 0.326          | 4.68 | 0.0002                 |
| PCC (RH) ↔ GP                      | 0.102          | 1.979 (0.420)       | 0.319          | 4.58 | 0.0003                 |
| MTG ↔ ITG                          | 0.102          | 0.662 (0.141)       | 0.319          | 4.58 | 0.0003                 |
| MTG ↔ Thalamus                     | 0.101          | 0.432 (0.092)       | 0.318          | 4.57 | 0.0003                 |
| PrCG ↔ pSTG                        | 0.098          | 0.363 (0.078)       | 0.314          | 4.50 | 0.0004                 |
| SOG ↔ GP                           | 0.098          | 0.704 (0.153)       | 0.313          | 4.49 | 0.0004                 |
| MTG ↔ Putamen                      | 0.097          | 0.225 (0.049)       | 0.311          | 4.46 | 0.0005                 |
| IFG orbitalis ↔ Amygdala           | 0.096          | 19.288 (4.237)      | 0.309          | 4.43 | 0.0006                 |
| IFG triangularis ↔ PoCG            | 0.095          | 0.192 (0.042)       | 0.309          | 4.42 | 0.0006                 |
| PCC (RH) ↔ Putamen                 | 0.095          | 0.960 (0.212)       | 0.308          | 4.41 | 0.0006                 |
| STG ↔ Hippocampus                  | 0.093          | 1.307 (0.291)       | 0.306          | 4.38 | 0.0007                 |
| PoCG ↔ AG                          | 0.092          | 0.758 (0.170)       | 0.304          | 4.35 | 0.0008                 |
| SPL ↔ GP                           | 0.092          | 0.486 (0.109)       | 0.304          | 4.35 | 0.0008                 |

|                                                                      |       |                 |       |      |        |
|----------------------------------------------------------------------|-------|-----------------|-------|------|--------|
| SPL ↔ Putamen                                                        | 0.092 | 0.200 (0.045)   | 0.303 | 4.34 | 0.0008 |
| IFG triangularis ↔ SOG                                               | 0.091 | 0.072 (0.016)   | 0.302 | 4.32 | 0.0009 |
| IFG triangularis ↔ pInsula                                           | 0.091 | 0.319 (0.072)   | 0.301 | 4.31 | 0.001  |
| IFG triangularis ↔ Cuneus                                            | 0.090 | 0.037 (0.008)   | 0.301 | 4.30 | 0.001  |
| STG pole ↔ CP (RH)                                                   | 0.090 | 14.430 (3.283)  | 0.300 | 4.29 | 0.001  |
| IFG opercularis ↔ Amygdala                                           | 0.089 | 33.199 (7.588)  | 0.298 | 4.27 | 0.001  |
| MOG ↔ GP                                                             | 0.089 | 0.906 (0.207)   | 0.298 | 4.27 | 0.001  |
| SOG ↔ Caudate                                                        | 0.089 | 9.195 (2.104)   | 0.298 | 4.26 | 0.001  |
| IFG triangularis ↔ LG                                                | 0.088 | 0.071 (0.016)   | 0.297 | 4.25 | 0.001  |
| STG pole ↔ Hippocampus                                               | 0.088 | 1.165 (0.269)   | 0.296 | 4.23 | 0.001  |
| MTG pole ↔ Hippocampus                                               | 0.087 | 0.456 (0.105)   | 0.295 | 4.22 | 0.001  |
| STG pole ↔ RedNc                                                     | 0.087 | 25.646 (5.942)  | 0.295 | 4.21 | 0.001  |
| IFG triangularis ↔ Amygdala                                          | 0.087 | 22.208 (5.151)  | 0.294 | 4.21 | 0.001  |
| PoCG (RH) ↔ STG pole                                                 | 0.086 | 28.570 (6.638)  | 0.294 | 4.20 | 0.001  |
| IFG orbitalis ↔ LG                                                   | 0.085 | 0.216 (0.050)   | 0.292 | 4.18 | 0.002  |
| IFG opercularis ↔ PoCG                                               | 0.085 | 0.222 (0.052)   | 0.291 | 4.17 | 0.002  |
| RedNc ↔ pITG                                                         | 0.084 | 28.520 (6.717)  | 0.290 | 4.15 | 0.002  |
| STG ↔ SOG                                                            | 0.084 | 0.808 (0.191)   | 0.289 | 4.13 | 0.002  |
| STG ↔ Putamen                                                        | 0.083 | 0.197 (0.047)   | 0.288 | 4.12 | 0.002  |
| IFG triangularis ↔ PrCG                                              | 0.083 | 0.372 (0.088)   | 0.288 | 4.11 | 0.002  |
| MTG pole ↔ Caudate                                                   | 0.083 | 0.992 (0.236)   | 0.288 | 4.11 | 0.002  |
| IFG orbitalis ↔ MTG                                                  | 0.082 | 0.208 (0.050)   | 0.285 | 4.08 | 0.002  |
| PrCG (RH) ↔ STG pole                                                 | 0.081 | 34.734 (8.383)  | 0.284 | 4.05 | 0.003  |
| MTG ↔ Caudate                                                        | 0.080 | 0.836 (0.202)   | 0.283 | 4.04 | 0.003  |
| IFG orbitalis ↔ FuG                                                  | 0.080 | 0.123 (0.030)   | 0.283 | 4.04 | 0.003  |
| LFOG ↔ Hippocampus                                                   | 0.080 | 2.923 (0.710)   | 0.282 | 4.02 | 0.003  |
| PrCG ↔ SMG                                                           | 0.079 | 0.796 (0.195)   | 0.280 | 4.00 | 0.003  |
| IFG triangularis ↔ Putamen                                           | 0.078 | 0.090 (0.022)   | 0.279 | 3.98 | 0.003  |
| SPL ↔ pMTG                                                           | 0.078 | 0.764 (0.188)   | 0.279 | 3.98 | 0.004  |
| IFG orbitalis ↔ SOG                                                  | 0.078 | 0.118 (0.029)   | 0.279 | 3.97 | 0.004  |
| PoCG ↔ SMG                                                           | 0.077 | 1.108 (0.274)   | 0.277 | 3.95 | 0.004  |
| SPL ↔ pSTG                                                           | 0.077 | 0.898 (0.223)   | 0.277 | 3.95 | 0.004  |
| Snigra ↔ pITG                                                        | 0.076 | 26.114 (6.485)  | 0.276 | 3.94 | 0.004  |
| PrCG ↔ pMTG                                                          | 0.076 | 0.861 (0.214)   | 0.276 | 3.94 | 0.004  |
| SPL ↔ STG pole                                                       | 0.076 | 0.046 (0.011)   | 0.276 | 3.93 | 0.004  |
| STG (RH) ↔ STG pole                                                  | 0.076 | 0.011 (0.003)   | 0.276 | 3.93 | 0.004  |
| Midbrain ↔ pITG                                                      | 0.076 | 2.947 (0.735)   | 0.275 | 3.93 | 0.004  |
| SPL (RH) ↔ Putamen                                                   | 0.076 | 1.135 (0.283)   | 0.275 | 3.92 | 0.004  |
| AG ↔ Putamen                                                         | 0.075 | 0.508 (0.127)   | 0.275 | 3.92 | 0.004  |
| STG ↔ PCC                                                            | 0.075 | 0.166 (0.042)   | 0.274 | 3.90 | 0.005  |
| GP ↔ pSTG (RH)                                                       | 0.075 | 3.310 (0.832)   | 0.273 | 3.90 | 0.005  |
| MFG ↔ Amygdala                                                       | 0.075 | 40.523 (10.191) | 0.273 | 3.89 | 0.005  |
| ITG ↔ Thalamus                                                       | 0.074 | 0.133 (0.033)   | 0.273 | 3.89 | 0.005  |
| STG ↔ MTG                                                            | 0.074 | 0.567 (0.143)   | 0.272 | 3.88 | 0.005  |
| PoCG ↔ STG pole                                                      | 0.074 | 0.017 (0.004)   | 0.271 | 3.87 | 0.005  |
| IFG orbitalis ↔ SPL (RH)                                             | 0.073 | 3.066 (0.778)   | 0.271 | 3.86 | 0.005  |
| pMFG ↔ IFG opercularis                                               | 0.073 | 1.138 (0.289)   | 0.270 | 3.85 | 0.006  |
| AG (RH) ↔ GP                                                         | 0.073 | 7.143 (1.818)   | 0.270 | 3.85 | 0.006  |
| SPL (RH) ↔ GP                                                        | 0.073 | 2.572 (0.655)   | 0.270 | 3.85 | 0.006  |
| Hippocampus ↔ Putamen                                                | 0.073 | 0.831 (0.212)   | 0.270 | 3.85 | 0.006  |
| MTG pole ↔ Putamen                                                   | 0.072 | 0.291 (0.075)   | 0.268 | 3.81 | 0.007  |
| Putamen ↔ pMTG                                                       | 0.072 | 0.197 (0.051)   | 0.267 | 3.81 | 0.007  |
| ITG ↔ LG                                                             | 0.072 | 1.114 (0.287)   | 0.267 | 3.81 | 0.007  |
| ITG ↔ Hippocampus                                                    | 0.071 | 0.168 (0.043)   | 0.266 | 3.79 | 0.007  |
| pMFG ↔ PrCG                                                          | 0.071 | 1.178 (0.305)   | 0.266 | 3.78 | 0.007  |
| MTG ↔ Cerebellum (RH)                                                | 0.070 | 18.432 (4.794)  | 0.265 | 3.77 | 0.008  |
| IFG triangularis ↔ SMG                                               | 0.070 | 0.280 (0.073)   | 0.264 | 3.76 | 0.008  |
| STG pole ↔ Midbrain (RH)                                             | 0.070 | 17.542 (4.580)  | 0.264 | 3.76 | 0.008  |
|                                                                      |       |                 |       |      |        |
| <b>Word Comprehension with Repetition covariate</b>                  |       |                 |       |      |        |
| MTG pole ↔ pMTG                                                      | 0.092 | 0.356 (0.087)   | 0.303 | 3.97 | 0.004  |
|                                                                      |       |                 |       |      |        |
| <b>Noncanonical Sentence Comprehension with Repetition covariate</b> |       |                 |       |      |        |
| ITG ↔ Cuneus                                                         | 0.116 | 0.604 (0.150)   | 0.341 | 3.91 | 0.004  |

|                   |       |               |       |      |       |
|-------------------|-------|---------------|-------|------|-------|
| AG (RH) ↔ LG (RH) | 0.108 | 2.337 (0.602) | 0.329 | 3.77 | 0.007 |
|-------------------|-------|---------------|-------|------|-------|

See Supplementary Table 1 for region abbreviation definitions. All regions are left hemisphere, unless indicated as right hemisphere with (RH).  $\beta_u$  = unstandardized estimated beta coefficient, SE = standard error,  $\beta_s$  = standardized estimated beta coefficient, Z = Z-score,  $BF_m$  (null) = Bayes Factor index indicating support for the null hypothesis. See Supplementary Table 1 for region abbreviation definitions.
